# Supplementary material
Source: Springer Nature journal article supplement (https://www.springermedizin.de/resource/supplementary/12889_2012_4212_MOESM2_ESM.pdf/9491652)

Population density  
(inhabitants / km<sup>2</sup>)

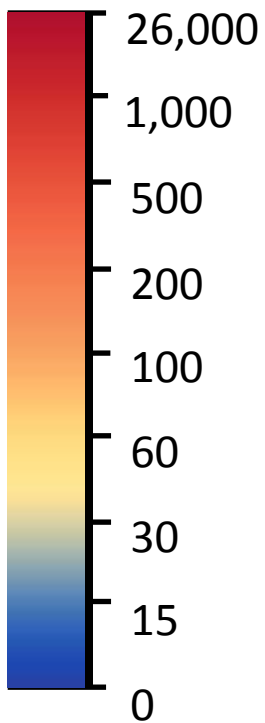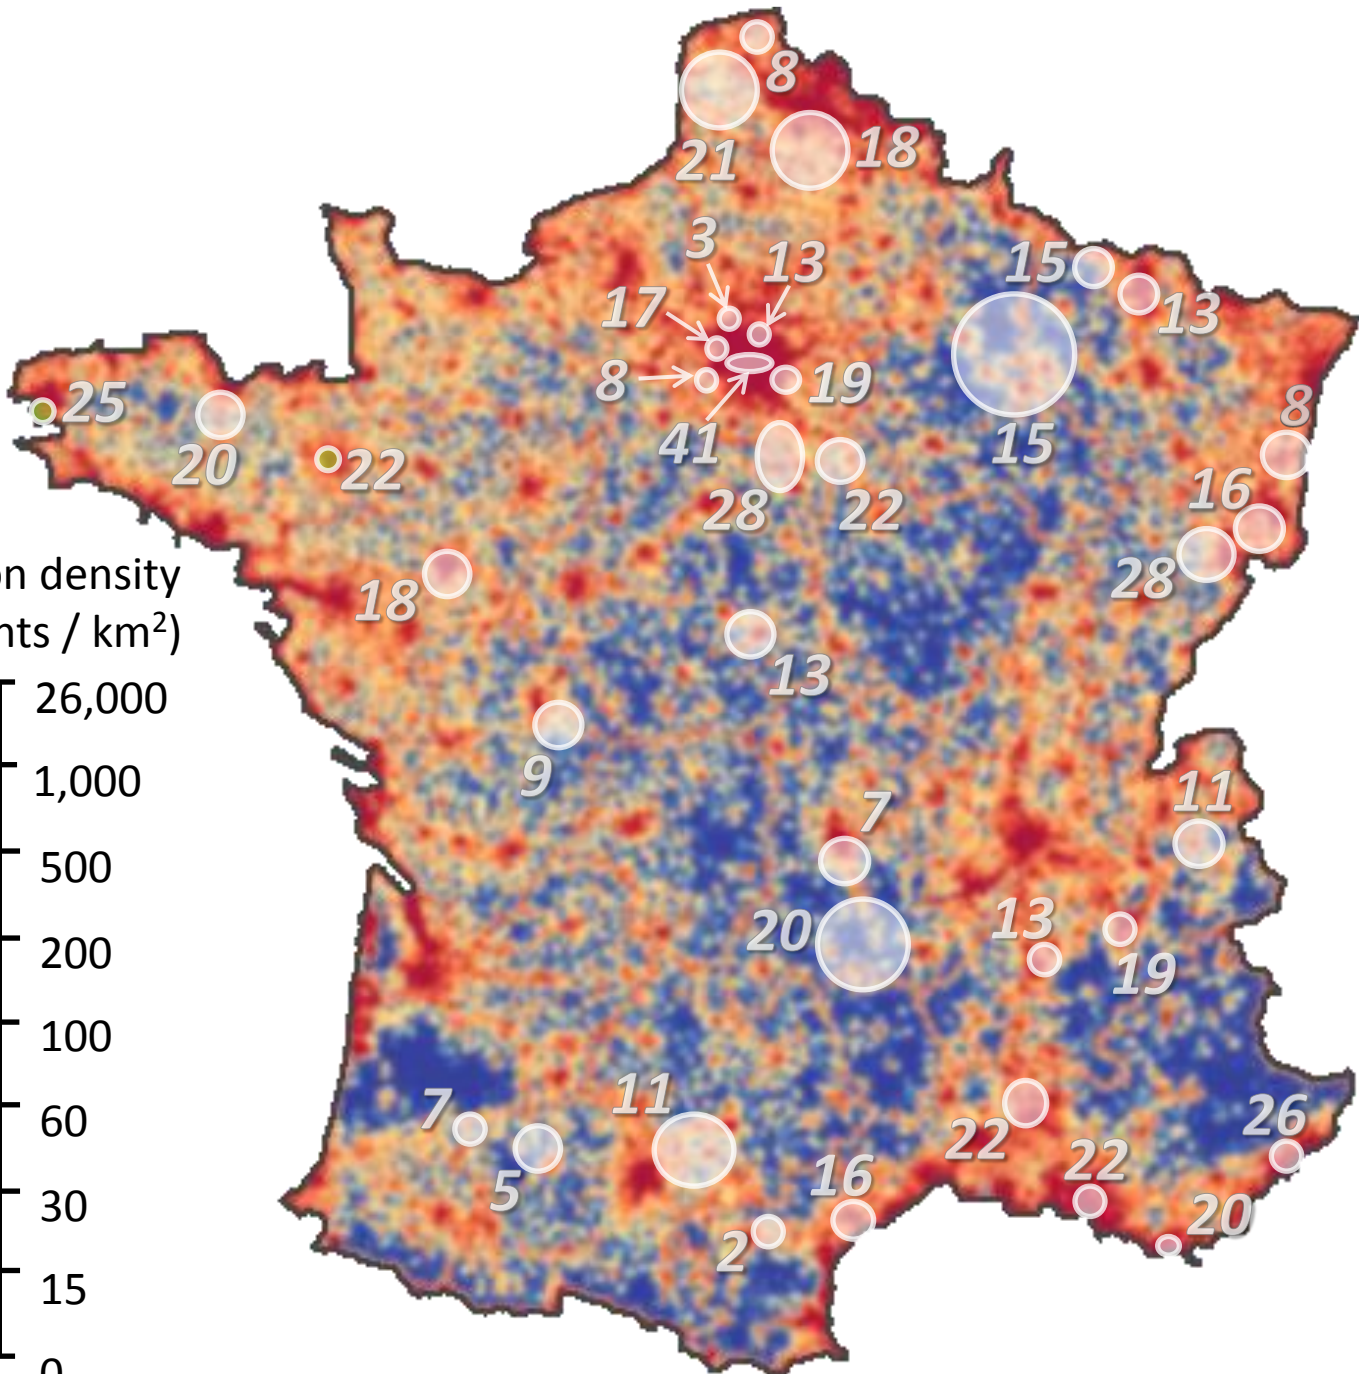

Supplement: MOESM2 [file 9491652]
